# Supplementary material for: Longitudinal immune profiles in type 1 leprosy reactions in Bangladesh, Brazil, Ethiopia and Nepal
Source: Springer Nature journal article supplement (doi:10.1186/s12879-015-1128-0), 2015-10-28
Supplement: MOESM1 [file 9740250]

**BIOMARKERS STUDY - NEPAL**

Patient study number: BMS-|\_|\_|\_|\_|\_|\_|\_|

Study Centre code: |\_|\_|\_|\_|

---

**CASE REPORT FORM**

**CONFIDENTIAL**

**BIOMARKERS STUDY - NEPAL**

A systematic study on *M.leprae* antigen-induced host profiles  
for the identification of biomarkers for diagnosis of leprosy reactions.

Medical Ethical Clearance number(s) NHRC: 751 and 445

Funding agency: Netherlands Leprosy Relief

*Coordinating scientist Nepal:*

Dr Deanna Hagge  
Mycobacterial Research Laboratories  
Anandaban Hospital  
PO Box 151, Kathmandu, Nepal  
Tel: +977-1-4290545; Fax: +977-1-4290538  
E-mail: [deannah@tlmnepal.org](mailto:deannah@tlmnepal.org)

*Local study centres Nepal:*

**Study centre code 01**  
Anandaban Hospital  
PO Box 151, Kathmandu, Nepal  
Tel: +977-1-4290545; Fax: +977-1-4290538

**Study centre code 02**  
LalGadh Leprosy Hospital  
Janakpur District, Nepal

*Coordinating scientist Netherlands:*

Dr. Annemieke Geluk  
LUMC, Dept. of Infectious Diseases  
Albinusdreef 2, Building 1, K5, 23333 ZA Leiden  
Tel: +31-71-5263844; Fax: +31-71-5216751  
E-mail: [a.geluk@lumc.nl](mailto:a.geluk@lumc.nl)

*Case report form and database design:*

Ron Schuring, Dr. Mirjam Bakker and Dr. Linda Oskam  
KIT Biomedical Research  
Meibergdreef 39, 1105 AZ Amsterdam, the Netherlands  
Tel +31-20-5665446; Fax +31-20-6971841  
E-mail: [L.Oskam@kit.nl](mailto:L.Oskam@kit.nl)

*Local data management:*

Saraswoti Khadge or Kapil Neupane  
Mycobacterial Research Laboratories  
Anandaban Hospital  
PO Box 151, Kathmandu, Nepal  
Tel: +977-1-4290545; Fax: +977-1-4290538  
E-mail: [immuno@tlmnepal.org](mailto:immuno@tlmnepal.org); [kapiln@tlmnepal.org](mailto:kapiln@tlmnepal.org)

---

Date: |\_|\_|\_| / |\_|\_|\_| / |\_|\_|\_| (mm/dd/yy) Name: ..... Signature: .....

---

## CONTENTS OF FILE

|                                                 |         |
|-------------------------------------------------|---------|
| General outline                                 | 1 page  |
| 1. Registration form                            | 2 pages |
| 2. Informed consent form                        | 2 pages |
| 3. Clinical data at intake                      | 1 page  |
| 4. Blood and urine collection at intake         | 1 page  |
| 5. Reaction status at intake & follow-up        | 2 pages |
| 6a. Reaction form Anandaban                     | 1 page  |
| 6b. Reaction scoring sheet                      | 2 pages |
| 7. Blood and urine collection at start reaction | 1 page  |
| 8. End of study form                            | 1 page  |
| 9. Blood and urine collection at end of study   | 1 page  |
| 10. General remarks                             | 1 page  |

*Always fill in the registration form, even when the patient is going to be excluded!!!*

**GENERAL OUTLINE**

**Aim of the study**

The aim of the BIOMARKERS – NEPAL study is to identify parameters that can predict the occurrence of leprosy-related reactions and nerve function impairment. We will study demographic, clinical, immunological and genetic parameters that may be involved in the development of leprosy reactions.

**Study outline**

**Intake**

New PB and MB leprosy patients (except TT patients without reactions) who are not on TB, or steroids treatment at intake will be included in the study. Leprosy patients who are already on MDT for more than 7 days, but do not have a reaction at intake will be excluded. Blood and urine will be collected for baseline data.

**Follow-up**

The patients will be followed for one year to see whether they develop reactions or new nerve function impairment.

**Reaction**

If the patient develops a reaction, data, blood and urine will be collected. With the blood and urine we can determine which components of the immunological profile of the patient have changed. At the end of the reaction we will also collect blood and urine to see whether the immunological profile has gone back to normal.

**End of the study**

Even if there are no reactions, blood and urine will be taken at the end of the study period (1 year) as part of the final assessment. Patients who remain in recurrent reaction for the whole year will be excluded. As some patients may return a little later than after 1 year, a period of up to 15 months is acceptable.

**Collaboration**

This project is a collaboration between Anandaban Leprosy Hospital in Nepal and Leiden University Medical Centre and KIT Biomedical Research in the Netherlands.

**Role of the partners**

**Anandaban**

The staff in Anandaban will include patients and controls, follow-up patients, collect clinical data and collect and process blood samples. They will also do the data entry for this part of the work. They will also train staff from Lal Gadh to do the same.

**Leiden University Medical Centre**

The staff in Leiden will test the samples on immunological and genetic parameters. They will also do the data entry for this part of the work. They will assist and train the partners in Nepal. They will also prepare the Standard Operating Procedures (SOPs) for the laboratory testing and coordinate the logistics of the sample collection, processing and shipment.

**KIT Biomedical Research**

The staff in Amsterdam will perform the serological testing of the samples. They will also do the data entry for this part of the work. They will coordinate the development of the case report form and the database and coordinate and facilitate the analysis of the data.

1. REGISTRATION FORM

Always fill in the registration form, even when the patient is going to be excluded!!! Please use capitals

Basic data

- 1. Patient name:
2. Age in years: |\_|\_|\_| [yy]
3. Sex: |\_| 1 = male 2 = female
4. Contact number/location:
5. New patient or relapse: |\_| 1 = new 2 = relapse (had complete course of MDT at least 2 years before intake)

If relapse:

End date of last MDT |\_|\_|\_| / |\_|\_|\_| [mm//yy]
Had reactions during previous MDT course? Yes / No

Exclusion criteria (fill in ALL exclusion criteria)

Table with 3 columns: Exclusion criteria, Yes / No, and If yes, exclude. Rows include Pure neural leprosy, TT leprosy, On treatment for TB, Receiving MDT for more than 7 days AND without reaction, Received steroid treatment in the last month, Planning to leave the area within 6 months, Under 18 or over 60 years old, and Pregnant.

**1. REGISTRATION FORM**

**Inclusion in study**

All exclusion criteria negative Yes / No *If no, exclude*

*If "Yes" explain study and ask for written informed consent  
Fill in form 2  
If "No" you can stop here*

Informed consent form signed Yes / No *If no, exclude*

*If yes, add signed form 2 to file and proceed to forms 3 and 4  
Allocate patient study number*

**6. Patient study number** BMS-|\_|\_|\_|\_|\_|\_|\_|\_|\_|

**Patient Hospital file number** |\_|\_|\_|\_|\_|\_|\_|\_|\_|\_|\_|\_|\_|\_|

**2. INFORMED CONSENT FORM**

**Patient study number** BMS-|\_|\_|\_|\_|\_|\_|\_|\_|\_|

**Patient Hospital file number** |\_|\_|\_|\_|\_|\_|\_|\_|\_|\_|

**THE LEPROSY MISSION, NEPAL  
ANANDABAN HOSPITAL  
Bio-Marker Study**

**Patient consent form**

(To be translated into appropriate local languages)

We wish to take a small amount of blood and urine from you, for use in a laboratory study. Approximately 20 ml of blood obtained using a needle and syringe and 10 ml clean catch mid-stream urine will be tested to see if your body is making an immune response to the leprosy bacteria.

This is an experimental test. Information obtained from this study may be useful in developing better ways of diagnosing early leprosy reactions and preventing it from consecutive deformities.

By your participation, you will be helping us to treat leprosy sufferers better. However if you do not wish to participate, your leprosy treatment will not be affected.

**I have understood the above and give consent to have approximately 20 ml of blood and 10 ml of urine at one time for healthy endemic control and two time points for patients (three time if reaction occurred) for research purposes.**

Signed \_\_\_\_\_

Witness \_\_\_\_\_

Date \_\_\_\_\_

Date \_\_\_\_\_

Staff who explained \_\_\_\_\_

Date \_\_\_\_\_

## 2. INFORMED CONSENT FORM

page 2 of 2

Patient study number BMS-|\_|\_|\_|\_|\_|\_|\_|\_|\_|\_|

Patient Hospital file number |\_|\_|\_|\_|\_|\_|\_|\_|\_|\_|\_|\_|\_|\_|\_|\_|

लेप्रोशी मिसन नेपाल, आनन्दवन अस्पताल

बायोमार्कर अध्ययन

## सहभागीको अनुमती पत्र

सहभागीको नाम..... अस्पताल नं.....

पयोगशालामा गरिने जाँचको लागि एपाइंवाट बमिफटी रगत र पिसाव दिन अनुरोध गर्दछौं । फरिव २५ मिमी जपी रगत सिरीन्जको सहायताले लिनेछौं र यसको अन्तमा १० मिमी सफा एरिफाले संकलन गरीएको पिसाव पनि लिइने छौं । यी रगत र पिशावका नमूनामा एपाइंको शरिरले फुछरोगको फिटानुको बंश संग फसरी पणफ्या गर्दछ भनेर हामी प्रयोगशालामा जाँच गरिने छ । यस अध्ययनले वाउने रियाक्सनको समस्यालाई छिट्टै पत्तालगार्ने उपचार गर्न र अङ्गभङ्ग हुनबाट बचाउन मद्दत गर्न सक्ने छ ।

यो एक प्रयोगात्मक जाँच हो । यस अध्ययनबाट प्राप्त जानकारीले भविष्यमा फुछरोगको बन्धु रामो एरिफाले निदान गर्न सकिने प्रफ्याको विकास गर्नको लागि मद्दत पुन्याउन सक्नेछ

यस अध्ययनमा एपाइंको सहभागीताले एपाइं र एपाइं जस्ता बर फुछरोगबाट पिडित व्यक्तिहरूलाई बन्धु रामो एरिफाले उपचार गर्न हामीलाई मद्दत पुग्ने छ । तैपनि एपाइं यस अध्ययनमा भाग लिन नचाहेमा पनि एपाइं पाउँदैं बाएको उपचारमा फुने बसर पर्ने छैन ।

यस अध्ययनमा मेरो सहभागीता स्वऐच्छिक हो भन्ने फुरा मैले बुझेको छु । २५ मि.लि रगत र १० मि.ली पिशाव स्वस्थ व्यक्तिबाट एक पटक, विरामीहरूबाट दुई पटक र यदि विरामीको रियाक्सन बाएमा तीन पटक अनुसन्धानको लागि दिन म राजी छु ।

सहभागीको सति \_\_\_\_\_ सादि \_\_\_\_\_

मिति \_\_\_\_\_ मिति \_\_\_\_\_

बुझाउने फर्मचारको सति \_\_\_\_\_

मिति \_\_\_\_\_

Date: |\_|\_|\_| / |\_|\_| / |\_|\_| (mm/dd/yy) Name: ..... Signature: .....

**BIOMARKERS STUDY - NEPAL**

Patient study number: BMS-|\_|\_|\_|\_|\_|\_|\_|\_|

Study Centre code: |\_|\_|\_|\_|

**3. CLINICAL DATA AT INTAKE****page 1 of 1**

7. Date |\_|\_|\_|\_|/|\_|\_|\_|\_|/|\_|\_|\_|\_| *dd/mm/yy*
8. Ridley & Jopling classification |\_| 1=TT (*exclude*);  
(clinical) 2=BT;3=BB;4=BL;5=LL;6=I
9. Number of skin lesions |\_|\_|\_|\_| *If 1-15: give exact number*  
*If more than 15: code 99*
10. Number of body parts involved |\_| *There are 7 body parts: 2 arms, 2 legs,*  
*head, front trunk, back trunk*
11. Number of nerves involved |\_|\_|\_|\_| *Count the number of nerves involved*
12. Duration of signs and symptoms |\_|\_|\_|\_| *In months since reported first signs*
13. Microscopy on slit skin smears |\_| *0=negative; 1=positive*
14. Average BI |\_|\_|\_|\_|
15. Ridley & Jopling classification |\_| 1=TT;2=BT;3=BB;4=BL;5=LL;6=I  
(histological)
16. Type of leprosy **treatment** |\_| *1=PB; 2=MB > If PB and TT,*  
*exclude*

**Ophthalmology**

17. Leprosy-related ophthalmic impairment |\_| *0=no; 1=yes*
18. Nerve function impairment |\_|  
*0=no*  
*1= nerve function reduction by  $\geq 2$  points in sensory and/or motor function tests*  
*2= corneal anaesthesia*  
*3= nerve tenderness*  
*4=mixed mild symptoms of neuritis (nerve enlarged, sensory, and motor*  
*function scores of 1)*  
*5= cutaneous neuritis*  
*6= a mild skin reaction in a patch near or overlying a facial nerve.*

*Collect and process 20 ml of blood and 10 ml of urine according to SOP1-2  
blood & urine processing. See form 4*

Date: |\_|\_|\_|\_| / |\_|\_|\_|\_| / |\_|\_|\_|\_| (mm/dd/yy) Name: ..... Signature: .....



**BIOMARKERS STUDY - NEPAL**

Patient study number: BMS-|\_|\_|\_|\_|\_|\_|\_|

Study Centre code: |\_|\_|\_|\_|

**4. BLOOD AND URINE COLLECTION AT INTAKE page 1 of 1**

*Collect and process 20 ml of blood and 10 ml of urine according to SOP1-2  
blood & urine processing*

Date of blood taking |\_|\_|\_|\_|/|\_|\_|\_|\_|/|\_|\_|\_|\_| dd/mm/yy

**Heparine blood**

Amount |\_|\_|\_|\_| in ml  
Number of tubes |\_|

**Total yield**

Plasma |\_|\_|\_|\_|. |\_| in ml  
Pax gene tube |\_|\_|\_|\_|. |\_| in ml  
PBMC |\_|\_|\_|\_|. |\_| in 10<sup>6</sup> cells  
Urine |\_|\_|\_|\_|. |\_| in ml

**Deviations from protocol**

Processing within 3 hours of bleeding? |\_| 0=yes; 1=no  
Processing at room temperature? |\_| 0=yes; 1=no  
Storage at -20°C? |\_| 0=yes; 1=no

*For Pax gene tubes:*

1 hr room temperature followed by freezing? |\_| 0=yes; 1=no

*Label all tubes (serum, urine & Pax gene) and 96-well plate for supernatants  
with the following code make sure the handwriting is eligible and that  
marking sticks well, also if wet:*

**BMS-####-4**

#### patient study number  
4 form number 4=intake; 7=start reaction; 9=end of study

Date: |\_|\_|\_|\_| / |\_|\_|\_|\_| / |\_|\_|\_|\_| (mm/dd/yy) Name: ..... Signature: .....

5. REACTION STATUS AT INTAKE & FOLLOW UP page 1 of 2

*Fill in 1 section (A,B,...) at intake and each time the patient is seen for treatment or complications*  
*If reaction or new nerve function impairment: fill in form 6*  
*After 1 year follow up proceed to form 8*

A. Date: |\_|\_|\_|/|\_|\_|/|\_|\_| (dd/mm/yy)

Reaction or new nerve function impairment Yes / No If yes go to form 6

Name doctor/health worker: ..... Signature: .....

B. Date: |\_|\_|\_|/|\_|\_|/|\_|\_| (dd/mm/yy)

Reaction or new nerve function impairment Yes / No If yes go to form 6

Name doctor/health worker: ..... Signature: .....

C. Date: |\_|\_|\_|/|\_|\_|/|\_|\_| (dd/mm/yy)

Reaction or new nerve function impairment Yes / No If yes go to form 6

Name doctor/health worker: ..... Signature: .....

D. Date: |\_|\_|\_|/|\_|\_|/|\_|\_| (dd/mm/yy)

Reaction or new nerve function impairment Yes / No If yes go to form 6

Name doctor/health worker: ..... Signature: .....

E. Date: |\_|\_|\_|/|\_|\_|/|\_|\_| (dd/mm/yy)

Reaction or new nerve function impairment Yes / No If yes go to form 6

Name doctor/health worker: ..... Signature: .....

F. Date: |\_|\_|\_|/|\_|\_|/|\_|\_| (dd/mm/yy)

Reaction or new nerve function impairment Yes / No If yes go to form 6

Name doctor/health worker: ..... Signature: .....

G. Date: |\_|\_|\_|/|\_|\_|/|\_|\_| (dd/mm/yy)

Reaction or new nerve function impairment Yes / No If yes go to form 6

Name doctor/health worker: ..... Signature: .....

H. Date: |\_|\_|\_|/|\_|\_|/|\_|\_| (dd/mm/yy)

Reaction or new nerve function impairment Yes / No If yes go to form 6

Name doctor/health worker: ..... Signature: .....

Date: |\_|\_|\_| / |\_|\_|\_| / |\_|\_|\_| (mm/dd/yy) Name: ..... Signature: .....

**5. REACTION STATUS AT INTAKE & FOLLOW UP page 2 of 2**

*Fill in 1 section (A,B,...) each time the patient is seen for treatment or complications*  
*If reaction or new nerve function impairment: proceed to form 6*  
*After 1 year follow up proceed to form 8*

I. Date: |\_|\_|\_|\_|/|\_|\_|\_|\_|/|\_|\_|\_|\_| (dd/mm/yy)  
Reaction or new nerve function impairment Yes / No *If yes go to form 6*  
Name doctor/health worker: ..... Signature: .....

J. Date: |\_|\_|\_|\_|/|\_|\_|\_|\_|/|\_|\_|\_|\_| (dd/mm/yy)  
Reaction or new nerve function impairment Yes / No *If yes go to form 6*  
Name doctor/health worker: ..... Signature: .....

K. Date: |\_|\_|\_|\_|/|\_|\_|\_|\_|/|\_|\_|\_|\_| (dd/mm/yy)  
Reaction or new nerve function impairment Yes / No *If yes go to form 6*  
Name doctor/health worker: ..... Signature: .....

L. Date: |\_|\_|\_|\_|/|\_|\_|\_|\_|/|\_|\_|\_|\_| (dd/mm/yy)  
Reaction or new nerve function impairment Yes / No *If yes go to form 6*  
Name doctor/health worker: ..... Signature: .....

M. Date: |\_|\_|\_|\_|/|\_|\_|\_|\_|/|\_|\_|\_|\_| (dd/mm/yy)  
Reaction or new nerve function impairment Yes / No *If yes go to form 6*  
Name doctor/health worker: ..... Signature: .....

N. Date: |\_|\_|\_|\_|/|\_|\_|\_|\_|/|\_|\_|\_|\_| (dd/mm/yy)  
Reaction or new nerve function impairment Yes / No *If yes go to form 6*  
Name doctor/health worker: ..... Signature: .....

O. Date: |\_|\_|\_|\_|/|\_|\_|\_|\_|/|\_|\_|\_|\_| (dd/mm/yy)  
Reaction or new nerve function impairment Yes / No *If yes go to form 6*  
Name doctor/health worker: ..... Signature: .....

6A. REACTION FORM ANANDABAN

We will only include the first reaction that a patient develops

Start of reaction

Date of reaction |\_|\_|\_|\_|/|\_|\_|\_|\_|/|\_|\_|\_|\_| (dd/mm/yy)
Is this at intake? Yes / No
If no: time since start MDT |\_|\_|\_|\_| in months
Type of reaction |\_| 1=Reversal reaction; 2=ENL; 3-neuritis
Start dose prednisolon |\_|\_|\_|\_| in milligrams
Start date of prednisolon |\_|\_|\_|\_|/|\_|\_|\_|\_|/|\_|\_|\_|\_| (dd/mm/yy)
End date of prednisolon |\_|\_|\_|\_|/|\_|\_|\_|\_|/|\_|\_|\_|\_| (dd/mm/yy)

- Fill in the reaction scoring sheet given in form 6B.
Collect and process 20 ml of blood and 10 ml of urine according to SOP1-2 blood & urine processing. See form 7

End of reaction

End of reaction treatment before end of follow up? |\_| 0=yes; 1=no

If yes:

Date last day reaction treatment |\_|\_|\_|\_|/|\_|\_|\_|\_|/|\_|\_|\_|\_| (dd/mm/yy)
Duration of reaction treatment |\_|\_|\_|\_| in weeks

If there are any observations relevant for the study and other than the ones on the form, please fill these in here

.....
.....
.....
.....

Date: |\_|\_|\_|\_| / |\_|\_|\_|\_| / |\_|\_|\_|\_| (mm/dd/yy) Name: ..... Signature: .....

**BIOMARKERS STUDY - NEPAL**

Patient study number: BMS-|\_|\_|\_|\_|\_|\_|\_|\_|\_|

Study Centre code: |\_|\_|\_|\_|

**6B. REACTION SCORING SHEET**

|                | <b>Criteria</b>                          | <b>0</b>    | <b>1</b>        | <b>2</b>                                   | <b>3</b>                         | <b>Score</b> |
|----------------|------------------------------------------|-------------|-----------------|--------------------------------------------|----------------------------------|--------------|
| A1             | Degree of inflammation of skin lesions   | <b>None</b> | <b>Erythema</b> | <b>Erythema and raised</b>                 | <b>Ulceration</b>                |              |
| A2             | Number of raised and/or inflamed lesions | <b>0</b>    | <b>1-5</b>      | <b>6-10</b>                                | <b>&gt;10</b>                    |              |
| A3             | Peripheral oedema due to reaction        | <b>None</b> | <b>Minimal</b>  | <b>Visible, but not affecting function</b> | <b>Oedema affecting function</b> |              |
| <b>A SCORE</b> |                                          |             |                 |                                            |                                  |              |

|    | <b>HANDS</b>     | <b>Purple 2g Monofilament scores</b> |                        |                         |                         | <b>Orange 10g Monofilament scores</b> |                         |                         | <b>Score</b> |
|----|------------------|--------------------------------------|------------------------|-------------------------|-------------------------|---------------------------------------|-------------------------|-------------------------|--------------|
|    |                  | <b>0</b>                             | <b>0.5</b>             | <b>1</b>                | <b>1.5</b>              | <b>2</b>                              | <b>2.5</b>              | <b>3</b>                |              |
| B1 | RIGHT Trigeminal | Felt                                 |                        |                         |                         |                                       |                         | Not felt                |              |
| B2 | LEFT Trigeminal  | Felt                                 |                        |                         |                         |                                       |                         | Not felt                |              |
| B3 | RIGHT ulnar      | <b>All sites felt</b>                | <b>1 site not felt</b> | <b>2 sites not felt</b> | <b>3 sites not felt</b> | <b>1 site not felt</b>                | <b>2 sites not felt</b> | <b>3 sites not felt</b> |              |
| B4 | LEFT ulnar       | <b>All sites felt</b>                | <b>1 site not felt</b> | <b>2 sites not felt</b> | <b>3 sites not felt</b> | <b>1 site not felt</b>                | <b>2 sites not felt</b> | <b>3 sites not felt</b> |              |
| B5 | RIGHT median     | <b>All sites felt</b>                | <b>1 site not felt</b> | <b>2 sites not felt</b> | <b>3 sites not felt</b> | <b>1 site not felt</b>                | <b>2 sites not felt</b> | <b>3 sites not felt</b> |              |
| B6 | LEFT median      | <b>All sites felt</b>                | <b>1 site not felt</b> | <b>2 sites not felt</b> | <b>3 sites not felt</b> | <b>1 site not felt</b>                | <b>2 sites not felt</b> | <b>3 sites not felt</b> |              |

|                | <b>FEET</b>            | <b>Orange 10g Monofilament scores</b> |                        |                         |                         | <b>Pink 300g Monofilament scores</b> |                         |                         | <b>Score</b> |
|----------------|------------------------|---------------------------------------|------------------------|-------------------------|-------------------------|--------------------------------------|-------------------------|-------------------------|--------------|
|                |                        | <b>0</b>                              | <b>0.5</b>             | <b>1</b>                | <b>1.5</b>              | <b>2</b>                             | <b>2.5</b>              | <b>3</b>                |              |
| B7             | RIGHT posterior tibial | <b>All sites felt</b>                 | <b>1 site not felt</b> | <b>2 sites not felt</b> | <b>3 sites not felt</b> | <b>1 site not felt</b>               | <b>2 sites not felt</b> | <b>3 sites not felt</b> |              |
| B8             | LEFT posterior tibial  | <b>All sites felt</b>                 | <b>1 site not felt</b> | <b>2 sites not felt</b> | <b>3 sites not felt</b> | <b>1 site not felt</b>               | <b>2 sites not felt</b> | <b>3 sites not felt</b> |              |
| <b>B SCORE</b> |                        |                                       |                        |                         |                         |                                      |                         |                         |              |

Date: |\_|\_|\_| / |\_|\_|\_| / |\_|\_|\_| (mm/dd/yy) Name: ..... Signature: .....

## 6B. REACTION SCORING SHEET

|                | <b>NERVE</b>            | <b>0</b> | <b>1</b> | <b>2</b> | <b>3</b> | <b>Score</b> |
|----------------|-------------------------|----------|----------|----------|----------|--------------|
| C1             | RIGHT Facial            | MRC =5   | MRC=4    | MRC=3    | MRC<3    |              |
| C2             | LEFT Facial             | MRC =5   | MRC=4    | MRC=3    | MRC<3    |              |
| C3             | RIGHT Ulnar             | MRC =5   | MRC=4    | MRC=3    | MRC<3    |              |
| C4             | LEFT Ulnar              | MRC =5   | MRC=4    | MRC=3    | MRC<3    |              |
| C5             | RIGHT Median            | MRC =5   | MRC=4    | MRC=3    | MRC<3    |              |
| C6             | LEFT Median             | MRC =5   | MRC=4    | MRC=3    | MRC<3    |              |
| C7             | RIGHT Radial            | MRC =5   | MRC=4    | MRC=3    | MRC<3    |              |
| C8             | LEFT Radial             | MRC =5   | MRC=4    | MRC=3    | MRC<3    |              |
| C9             | RIGHT Lateral Popliteal | MRC =5   | MRC=4    | MRC=3    | MRC<3    |              |
| C10            | LEFT Lateral Popliteal  | MRC =5   | MRC=4    | MRC=3    | MRC<3    |              |
| <b>C SCORE</b> |                         |          |          |          |          |              |

|                    |                        |  |
|--------------------|------------------------|--|
| <b>Total score</b> | <b>Scores of A+B+C</b> |  |
|--------------------|------------------------|--|

*This sheet is used to grade the severity of reactions. It has been developed by Walker et al. and published in PLoS Negl. Trop. Dis., 2008: 2(12): e351.*

**7. BLOOD AND URINE COLLECTION AT START REACTION**page **1 of 1**

*Collect and process 20 ml of blood and 10 ml of urine according to SOP1-2  
blood & urine processing*

Date of blood taking |\_|\_|\_|\_|/|\_|\_|\_|\_|/|\_|\_|\_|\_| *dd/mm/yy***Heparine blood**Amount |\_|\_|\_|\_| *in ml*

Number of tubes |\_|\_|

**Total yield**Plasma |\_|\_|\_|\_|.|\_|\_| *in ml*Pax gene tube |\_|\_|\_|\_|.|\_|\_| *in ml*PBMC |\_|\_|\_|\_|.|\_|\_| *in 10<sup>6</sup> cells*Urine |\_|\_|\_|\_|.|\_|\_| *in ml***Deviations from protocol**Processing within 3 hours of bleeding? |\_|\_| *0=yes; 1=no*Processing at room temperature? |\_|\_| *0=yes; 1=no*Storage at -20°C? |\_|\_| *0=yes; 1=no**For Pax gene tubes:*1 hr room temperature followed by freezing? |\_|\_| *0=yes; 1=no*

*Label all tubes (serum, urine & PAXgene™) and 96-well plate for  
supernatants with the following code make sure the handwriting is eligible  
and that marking sticks well, also if wet:*

**BMS-#####-7**##### *patient study number***7** *form number* 4=intake; 7=start reaction; 9=end of study

Date: |\_|\_|\_|\_| / |\_|\_|\_|\_| / |\_|\_|\_|\_| (mm/dd/yy) Name: ..... Signature: .....

8. END OF STUDY FORM

*The study ends 1 year (12 to 15 months) after the start of treatment*

Date of assessment |\_|\_|\_|\_|/|\_|\_|\_|\_|/|\_|\_|\_|\_| (dd/mm/yy)

MDT Treatment completed |\_| Y=Yes; N=No

How many monthly doses of MDT taken? |\_|\_|\_|\_| of |\_|\_|\_|\_| in |\_|\_|\_|\_| months

Did the patient develop reaction during the study period? |\_| 0=No, 1=Yes

*Compare the ophthalmic and physiotherapy assessments of the beginning and the end of the study*

Is the patient currently free of reactions? Yes / No

Is the patient currently under treatment for reaction? Yes / No

Were there new impairments during the study period? |\_| 0=No, 1=Yes

Are any of the previously existing impairments worse at the end of the study than at the beginning of the study? |\_| 0=No, 1=Yes

Other remarks

.....  
.....  
.....  
.....  
.....  
.....  
.....

*Collect and process 20 ml of blood and 10 ml of urine according to SOP1-2 blood & urine processing. Proceed to form 9*



# 9. BLOOD AND URINE COLLECTION AT END OF STUDY

**page 1 of 1**

*Collect and process 25 ml of blood and 10 ml of urine according to SOP1-2 blood & urine processing*

Date of blood taking |\_|\_|\_|\_|/|\_|\_|\_|\_|/|\_|\_|\_|\_| dd/mm/yy

### Heparine blood

Amount |\_|\_|\_|\_| in ml  
Number of tubes |\_|

### Total yield

Plasma |\_|\_|\_|\_|. |\_| in ml  
Pax gene tube |\_|\_|\_|\_|. |\_| in ml  
PBMC |\_|\_|\_|\_|. |\_| in 10<sup>6</sup> cells  
Urine |\_|\_|\_|\_|. |\_| in ml

### Deviations from protocol

Processing within 3 hours of bleeding? |\_| 0=yes; 1=no  
Processing at room temperature? |\_| 0=yes; 1=no  
Storage at -20°C? |\_| 0=yes; 1=no

*For Pax gene tubes:*

1 hr room temperature followed by freezing? |\_| 0=yes; 1=no

*Label all tubes (serum, urine & Pax gene) and 96-well plate for supernatants with the following code make sure the handwriting is eligible and that marking sticks well, also if wet:  
BMS-####-9  
##### patient study number  
9 form number 4=intake; 7=start reaction; 9=end of study*

**10. GENERAL REMARKS**

If there are any observations relevant for the study and other than the ones on the forms, please fill these in here

.....

.....

.....

.....

.....

.....

.....

.....

.....

.....

.....

.....

.....

.....

.....

.....

.....

.....

.....

.....

.....

.....

.....

.....

.....

.....

.....
